# Supplementary material for: Nodal immune flare mimics nodal disease progression following neoadjuvant immune checkpoint inhibitors in non-small cell lung cancer
Source: PubMed Central journal article supplement (PMC8376947; doi:10.1038/s41467-021-25188-0), 2021-08-19
Supplement: 41467_2021_25188_MOESM1_ESM.pdf [file 41467_2021_25188_MOESM1_ESM.pdf]

## Supplementary Information

### Nodal Immune Flare Mimics Nodal Disease Progression Following Neoadjuvant Immune Checkpoint Inhibitors in Non-Small Cell Lung Cancer

Tina Cascone<sup>1,\*</sup>, Annikka Weissferdt<sup>2,3</sup>, Myrna C. B. Godoy<sup>4</sup>, William N. William Jr.<sup>1,5</sup>, Cheuk H. Leung<sup>6</sup>, Heather Y. Lin<sup>6</sup>, Sreyashi Basu<sup>7</sup>, Shalini S. Yadav<sup>7</sup>, Apar Pataer<sup>3</sup>, Kyle G. Mitchell<sup>3</sup>, Md Abdul Wadud Khan<sup>8</sup>, Yushu Shi<sup>6,9</sup>, Cara Haymaker<sup>10</sup>, Luisa M. Solis<sup>10</sup>, Edwin R. Parra<sup>10</sup>, Humam Kadara<sup>10</sup>, Ignacio I. Wistuba<sup>1,10</sup>, Padmanee Sharma<sup>7,11</sup>, James P. Allison<sup>7,12</sup>, Nadim J. Ajami<sup>13</sup>, Jennifer A. Wargo<sup>8</sup>, Robert R. Jenq<sup>13,14</sup>, Don L. Gibbons<sup>1</sup>, J. Jack Lee<sup>6</sup>, Stephen G. Swisher<sup>3</sup>, Ara A. Vaporciyan<sup>3</sup>, John V. Heymach<sup>1,\*,#</sup>, Boris Sepesi<sup>3,#</sup>

#### Author Affiliations:

<sup>1</sup>Department of Thoracic/Head and Neck Medical Oncology, The University of Texas MD Anderson Cancer Center, 1515 Holcombe Blvd., Unit 432, Houston, TX, 77030.

<sup>2</sup>Department of Pathology, The University of Texas MD Anderson Cancer Center, 1515 Holcombe Blvd., Houston, TX, 77030.

<sup>3</sup>Department of Thoracic and Cardiovascular Surgery, The University of Texas MD Anderson Cancer Center, 1515 Holcombe Blvd., Houston, TX, 77030.

<sup>4</sup>Department of Thoracic Imaging, The University of Texas MD Anderson Cancer Center, 1515 Holcombe Blvd., Houston, TX, 77030.

<sup>5</sup>Hospital BP, a Beneficencia Portuguesa de Sao Paulo, R. Maestro Cardim 769, Sao Paulo, Brazil.

<sup>6</sup>Department of Biostatistics, The University of Texas MD Anderson Cancer Center, 1400 Pressler Street, Unit 1411, Houston, TX, 77030.

<sup>7</sup>The Immunotherapy Platform, The University of Texas MD Anderson Cancer Center, 1515 Holcombe Blvd., Houston, TX, 77030.

<sup>8</sup>Department of Surgical Oncology, The University of Texas MD Anderson Cancer Center, 1515 Holcombe Blvd., Houston, TX, 77030.

<sup>9</sup>Department of Statistics, The University of Missouri, Columbia, MO, 65201.

<sup>10</sup>Department of Translational Molecular Pathology, The University of Texas MD Anderson Cancer Center, 1515 Holcombe Blvd., Houston, TX, 77030.

<sup>11</sup>Department of Genitourinary Medical Oncology, The University of Texas MD Anderson Cancer Center, 1515 Holcombe Blvd., Houston, TX, 77030.

<sup>12</sup>Department of Immunology, The University of Texas MD Anderson Cancer Center, 1515 Holcombe Blvd., Houston, TX, 77030.

<sup>13</sup>Department of Genomic Medicine, The University of Texas MD Anderson Cancer Center, 1515 Holcombe Blvd., Houston, TX, 77030.

<sup>14</sup>CPRIT Scholar in Cancer Research, Houston, USA.

#These authors contributed equally.

\*Corresponding authors.

## Supplementary Figures and Legends

Probabilities of observing no NIF cases in ICON chemotherapy cohort

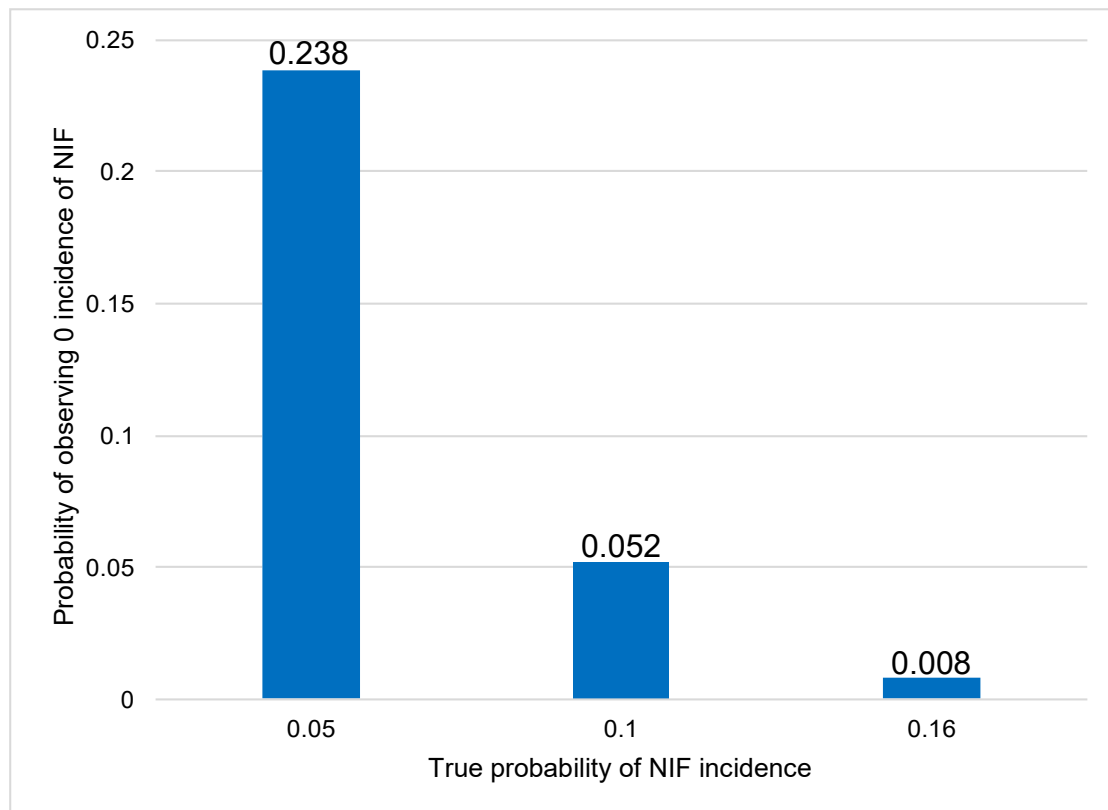

Supplementary Figure 1. Probabilities of observing no NIF incidence in ICON cohort. The probabilities of observing 0 incidence of NIF in the 28 ICON patients were 23.8%, 5.2%, and only 0.8% if the true NIF rates were 5%, 10%, and 16%, respectively. The blue bars represent the probability of observing 0 incidence of NIF. The calculations were performed using the binomial distribution. ICON, Immunogenomic profiling in NSCLC; NIF, Nodal immune flare. Source data are provided as a Source Data file.

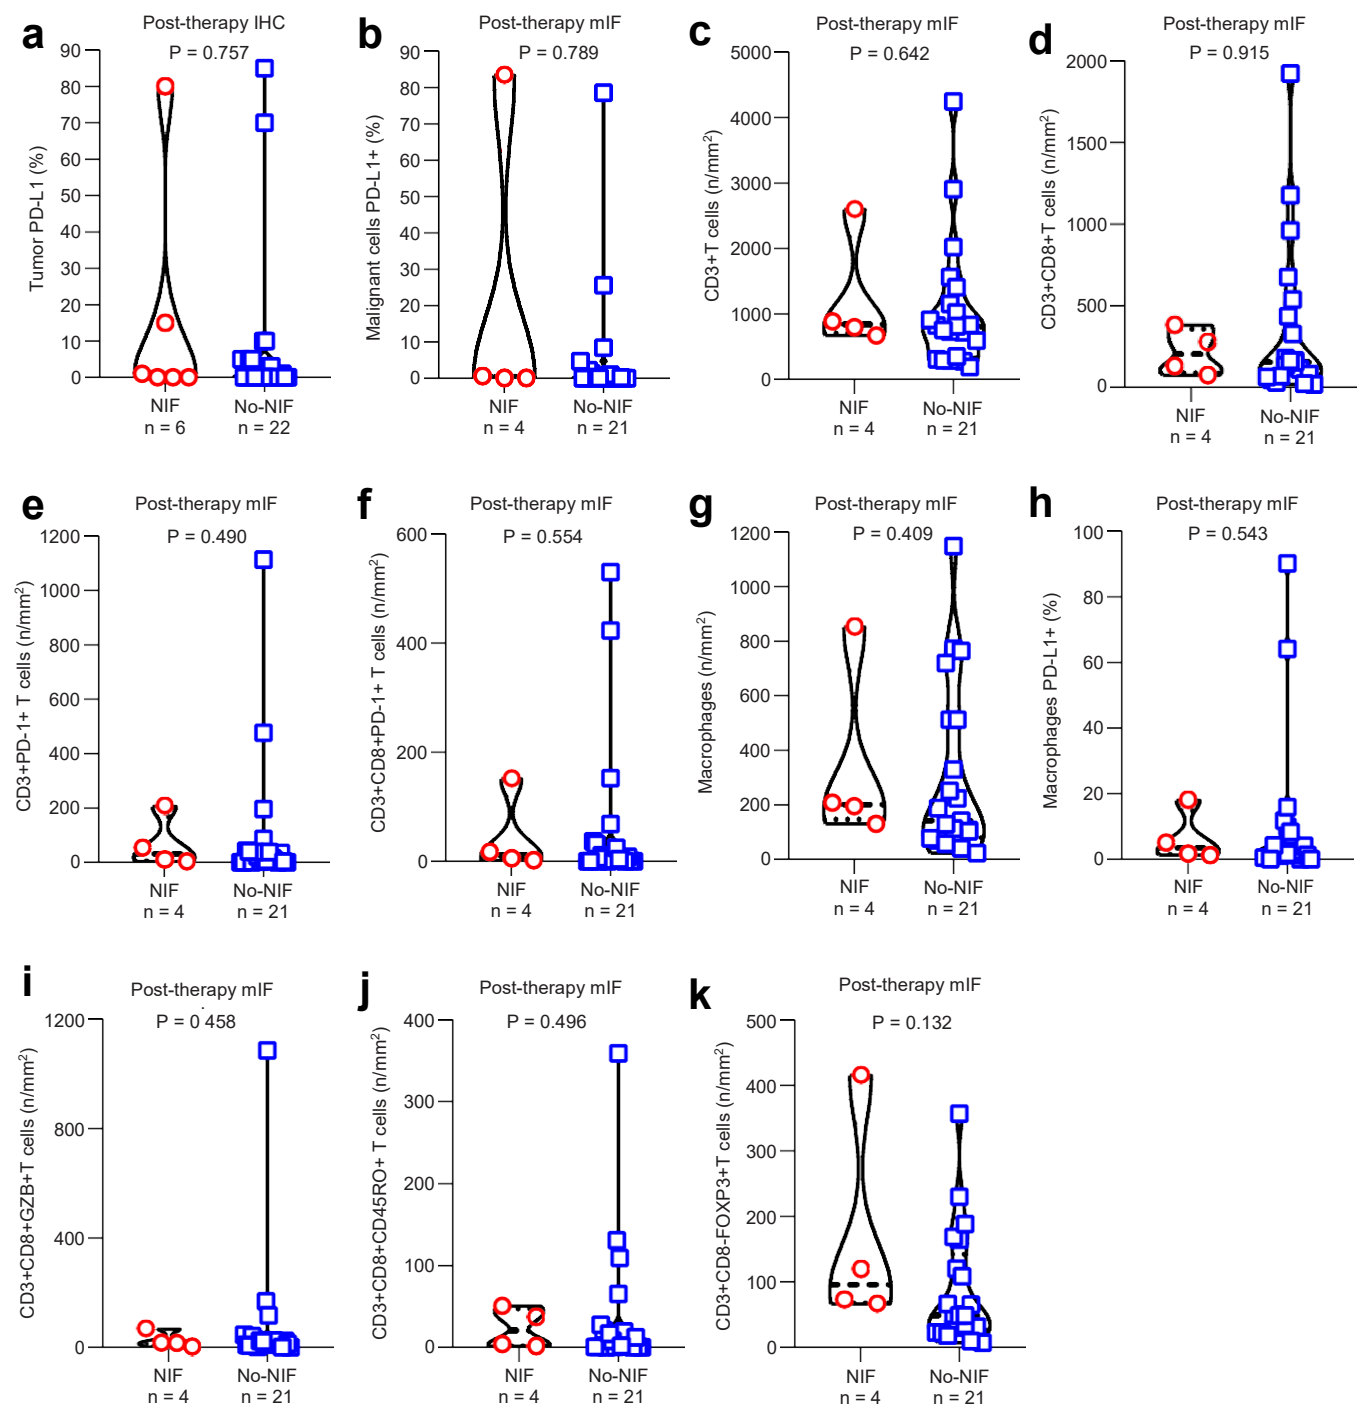

**Supplementary Figure 2**

Supplementary Figure 2. Immune infiltrates in post-therapy tumor samples of NEOSTAR patients with NIF/non-caseating granulomas and No-NIF. a, Post-therapy tumor PD-L1 (%) expression by immunohistochemistry (IHC) in malignant cells from NIF (n=6) and No-NIF (n=22) patients. b-h, Post-therapy mIF staining of tumor samples for cell populations identified with co-expression markers in panel 1 as (b) malignant cells PD-L1+ (%), (c) CD3+ T cells (n/mm<sup>2</sup>), (d) CD3+CD8+ T cells (n/mm<sup>2</sup>), (e) CD3+PD-1+ T cells (n/mm<sup>2</sup>), (f) CD3+CD8+PD-1+ T cells (n/mm<sup>2</sup>), (g) macrophages (n/mm<sup>2</sup>), (h) macrophages PD-L1+ (%) from NIF (n=4) and No-NIF (n=21) patients. i-k, Post-therapy mIF staining of tumor samples for cell populations identified with co-expression markers in panel 2 as (i) CD3+CD8+GZB+ T cells (n/mm<sup>2</sup>), (j) CD3+CD8+CD45RO+ T cells (n/mm<sup>2</sup>), (k) CD3+CD8+FOXP3+ T cells (n/mm<sup>2</sup>) from NIF (n=4) and No-NIF (n=21) patients. The NIF group for both IHC and mIF analyses included available tumor samples from patients with pathological evidence of non-caseating granulomas. Experiments and scorings/quantifications related to the presented results were conducted once. Data are presented as median with minima, lower and upper quartiles, and maxima. The dashed line indicates the median; the dotted lines indicate the lower quartile and upper quartile values; top and bottom of the violin plots indicate the maxima and minima. Two-sided P values are from Wilcoxon rank-sum test. The red circles depict data from the NIF group, and the blue squares depict data from the No-NIF group. IHC, immunohistochemistry; mIF, multiplex immunofluorescence. Source data are provided as a Source Data file.

## Supplementary Tables

Supplementary Table 1. Proportion of patients with or without post-therapy tumor PD-L1 in No-NIF and NIF groups.

|                          |        | No-NIF  | NIF    | P value |
|--------------------------|--------|---------|--------|---------|
|                          | Status | n (%)   | n (%)  |         |
| Post-therapy tumor PD-L1 | < 1%   | 12 (55) | 3 (50) | 1.00    |
|                          | ≥ 1%   | 10 (45) | 3 (50) |         |

NIF, nodal immune flare; NIF group includes available post-therapy tissue samples with non-caseating granulomas. n, number of patients. Two-sided P value is from unconditional exact test with z-pooled statistic.



Supplementary Table 2. Immune cell gene expression scores by NanoString in resected nodes following neoadjuvant ICIs in NIF and No-NIF groups.

| Immune cells          |    | No-NIF                             |   | NIF                                | P value |
|-----------------------|----|------------------------------------|---|------------------------------------|---------|
|                       | n  | Expression score median (min, max) | n | Expression score median (min, max) |         |
| CD45 cells            | 29 | 10.69 (9.91, 11.12)                | 8 | 10.92 (10.55, 12.28)               | 0.043   |
| Macrophages           | 29 | 10.33 (9.66, 12.16)                | 8 | 11.01 (10.27, 13.14)               | 0.012   |
| DCs                   | 29 | 6.28 (4.9, 7.84)                   | 8 | 7.61 (6.88, 8.24)                  | 0.0001  |
| Cytotoxic cells       | 29 | 8.30 (7.56, 9.00)                  | 8 | 8.66 (8.19, 9.55)                  | 0.086   |
| Th1 cells             | 29 | 6.47 (4.71, 7.45)                  | 8 | 6.76 (6.37, 7.13)                  | 0.073   |
| Exhausted CD8 T cells | 29 | 5.87 (4.61, 6.96)                  | 8 | 7.00 (6.00, 8.69)                  | 0.003   |

Expression score is shown as median log<sub>2</sub> normalized count. NIF group includes available post-therapy samples with non-caseating granulomas. n, number of patients; DCs, dendritic cells; Th1, T helper 1 cells. Two-sided P value is from Wilcoxon rank-sum test. Source data are provided as a Source Data file.

Supplementary Table 3. Association of NIF with MPR in ITT population of NEOSTAR patients.

| Pathologic response                   | Overall  | NIF     | No-NIF   | P value |
|---------------------------------------|----------|---------|----------|---------|
|                                       | n (%)    | n (%)   | n (%)    |         |
| pCR + MPR (0 - 10 % viable tumor)     | 13 (30)  | 1 (14)  | 12 (32)  | 0.357   |
| No MPR, No surgery performed on trial | 31(70)   | 6 (86)* | 25 (68)  |         |
|                                       |          |         |          |         |
| Total                                 | 44 (100) | 7 (100) | 37 (100) |         |

NIF, nodal immune flare; NIF includes cases with radiologically abnormal nodes in absence of malignancy and with non-caseating granulomas on pathological evaluation. pCR, pathologic complete response; MPR, major pathologic response. n, number of patients. \*Two patients underwent surgery off trial, one patient declined surgery. Two-sided P value is from unconditional exact test with z-pooled statistic.

Supplementary Table 4. Association of NIF with the percentage viable tumor cells in NEOSTAR patients resected on trial.

|                      | NIF* |                      | No-NIF^ |                      | P value |
|----------------------|------|----------------------|---------|----------------------|---------|
|                      | n    | Median<br>(min, max) | n       | Median<br>(min, max) |         |
| % viable tumor cells | 4    | 38<br>(0, 62)        | 33      | 33<br>(0, 97.5)      | 0.842   |

NIF, nodal immune flare; NIF includes cases with radiologically abnormal nodes in absence of malignancy and with non-caseating granulomas on pathological evaluation. n, number of patients.

\*Two patients had surgery off trial and one patient declined surgery. The percentage of viable tumor for those resected off trial was not included. ^Four patients did not undergo surgery. Two-sided P value is from Wilcoxon rank-sum test. Source data are provided as a Source Data file.

Supplementary Table 5. Association of NIF with radiographic responses in NEOSTAR patients.

| Radiographic response | Overall  | NIF*    | No-NIF   | P value |
|-----------------------|----------|---------|----------|---------|
|                       | n (%)    | n (%)   | n (%)    |         |
| CR/PR                 | 9 (21)   | 1 (14)  | 8 (22)   | 1.00    |
| SD/PD, N/E            | 35 (79)  | 6 (86)  | 29 (78)  |         |
|                       |          |         |          |         |
| Total                 | 44 (100) | 7 (100) | 37 (100) |         |

NIF, nodal immune flare; NIF includes cases with radiologically abnormal nodes in absence of malignancy and with non-caseating granulomas on pathological evaluation. CR, complete response; PR, partial response; SD, stable disease; PD, progressive disease; n, number of patients. \*One patient was not radiographically evaluable on trial as received one dose of ICIs complicated by treatment-related adverse event (TRAE) and underwent radiographic restaging after neoadjuvant chemotherapy off trial. N/E, not evaluable. Two-sided P value is from unconditional exact test with z-pooled statistic.

Supplementary Table 6. Association of treatment-related adverse events (TRAEs) by grade in NIF as compared to No-NIF patients in NEOSTAR study.

|        | TRAE<br>Grade 1-2<br>n (%) | TRAE<br>Grade 3-5<br>n (%) | P value |
|--------|----------------------------|----------------------------|---------|
| NIF    | 4 (67)                     | 2 (33)                     | 0.141   |
| No-NIF | 28 (90)                    | 3 (10)                     |         |

NIF, nodal immune flare; NIF includes cases with radiologically abnormal nodes in absence of malignancy and with non-caseating granulomas on pathological evaluation. TRAE, treatment-related adverse event; n, number of patients. Seven of 44 patients did not have TRAE (1 NIF, 6 No-NIF). Two-sided P value is from unconditional exact test with z-pooled statistic.

Supplementary Table 7. Frequencies of treatment-related adverse events (TRAEs) in NIF patients of NEOSTAR study.

| TRAE                               |           |    | NIF<br>(n = 7) |    |           |    |
|------------------------------------|-----------|----|----------------|----|-----------|----|
|                                    | Any grade |    | Grade 1-2      |    | Grade 3-5 |    |
|                                    | Count     | %  | Count          | %  | Count     | %  |
| Fatigue                            | 4         | 57 | 4              | 57 |           |    |
| Rash acneiform                     | 3         | 43 | 3              | 43 |           |    |
| Diarrhea                           | 2         | 29 | 1              | 14 | 1         | 14 |
| Anemia                             | 2         | 29 | 2              | 29 |           |    |
| Nausea                             | 2         | 29 | 2              | 29 |           |    |
| Hypermagnesemia                    | 1         | 14 | 0              | 0  | 1         | 14 |
| Alanine aminotransferase increased | 1         | 14 | 1              | 14 |           |    |
| Blood bilirubin increased          | 1         | 14 | 1              | 14 |           |    |
| Headache                           | 1         | 14 | 1              | 14 |           |    |
| Hyponatremia                       | 1         | 14 | 1              | 14 |           |    |
| Psoriasis                          | 1         | 14 | 1              | 14 |           |    |
| Hemoptysis                         | 1         | 14 | 1              | 14 |           |    |
| Pruritus                           | 1         | 14 | 1              | 14 |           |    |
| Vomiting                           | 1         | 14 | 1              | 14 |           |    |

NIF, nodal immune flare; NIF includes cases with radiologically abnormal nodes in absence of malignancy and with non-caseating granulomas on pathological evaluation. TRAE, treatment-related adverse event; NIF, nodal immune flare. n, number of patients. One patient did not have TRAE.

Supplementary Table 8. Frequencies of treatment-related adverse events (TRAEs) in No-NIF patients of NEOSTAR study.

| TRAE                                 |           |    | No-NIF<br>(n = 37) |    |           |   |
|--------------------------------------|-----------|----|--------------------|----|-----------|---|
|                                      | Any grade |    | Grade 1-2          |    | Grade 3-5 |   |
|                                      | Count     | %  | Count              | %  | Count     | % |
| Rash acneiform                       | 14        | 38 | 14                 | 38 |           |   |
| Fatigue                              | 11        | 30 | 11                 | 30 |           |   |
| Cough                                | 7         | 19 | 7                  | 19 |           |   |
| Diarrhea                             | 7         | 19 | 7                  | 19 |           |   |
| Nausea                               | 6         | 16 | 6                  | 16 |           |   |
| Hyponatremia                         | 4         | 11 | 3                  | 8  | 1         | 3 |
| Anemia                               | 3         | 8  | 3                  | 8  |           |   |
| Dyspnea                              | 3         | 8  | 3                  | 8  |           |   |
| Pruritus                             | 3         | 8  | 3                  | 8  |           |   |
| Pneumonitis                          | 2         | 5  | 1                  | 3  | 1         | 3 |
| Alanine aminotransferase increased   | 2         | 5  | 2                  | 5  |           |   |
| Chills                               | 2         | 5  | 2                  | 5  |           |   |
| Flu-like symptoms                    | 2         | 5  | 2                  | 5  |           |   |
| Headache                             | 2         | 5  | 2                  | 5  |           |   |
| Hyperthyroidism                      | 2         | 5  | 2                  | 5  |           |   |
| Hypomagnesemia                       | 2         | 5  | 2                  | 5  |           |   |
| Hypothyroidism                       | 2         | 5  | 2                  | 5  |           |   |
| Myalgia                              | 2         | 5  | 2                  | 5  |           |   |
| Sinus tachycardia                    | 2         | 5  | 2                  | 5  |           |   |
| WBC increased                        | 2         | 5  | 2                  | 5  |           |   |
| Hypoxia                              | 1         | 3  | 0                  | 0  | 1         | 3 |
| Pneumonia                            | 1         | 3  | 0                  | 0  | 1         | 3 |
| ANC increased                        | 1         | 3  | 1                  | 3  |           |   |
| Anorexia                             | 1         | 3  | 1                  | 3  |           |   |
| Aspartate aminotransferase increased | 1         | 3  | 1                  | 3  |           |   |
| Atypical Guillain-Barre` syndrome    | 1         | 3  | 1                  | 3  |           |   |
| Blurred vision                       | 1         | 3  | 1                  | 3  |           |   |
| BUN increased                        | 1         | 3  | 1                  | 3  |           |   |
| Creatinine increased                 | 1         | 3  | 1                  | 3  |           |   |
| Dry skin                             | 1         | 3  | 1                  | 3  |           |   |
| Eye pain                             | 1         | 3  | 1                  | 3  |           |   |
| Fever                                | 1         | 3  | 1                  | 3  |           |   |
| Generalized muscle weakness          | 1         | 3  | 1                  | 3  |           |   |
| Hemoptysis                           | 1         | 3  | 1                  | 3  |           |   |

|                        |   |   |   |   |  |  |
|------------------------|---|---|---|---|--|--|
| Hypernatremia          | 1 | 3 | 1 | 3 |  |  |
| Hyperuricemia          | 1 | 3 | 1 | 3 |  |  |
| Hypotension            | 1 | 3 | 1 | 3 |  |  |
| Myositis               | 1 | 3 | 1 | 3 |  |  |
| Non-cardiac chest pain | 1 | 3 | 1 | 3 |  |  |
| Pain                   | 1 | 3 | 1 | 3 |  |  |
| Rash maculopapular     | 1 | 3 | 1 | 3 |  |  |
| Urticaria              | 1 | 3 | 1 | 3 |  |  |
| Vomiting               | 1 | 3 | 1 | 3 |  |  |

NIF, nodal immune flare; NIF includes cases with radiologically abnormal nodes in absence of malignancy and with non-caseating granulomas on pathological evaluation. WBC, White blood count; ANC, absolute neutrophil count; BUN; blood urea nitrogen. n, number of patients. Six patients did not have TRAE.
