# Supplementary material for: Nodal immune flare mimics nodal disease progression following neoadjuvant immune checkpoint inhibitors in non-small cell lung cancer
Source: PubMed Central journal article supplement (PMC8376947; doi:10.1038/s41467-021-25188-0), 2021-08-19
Supplement: 41467_2021_25188_MOESM2_ESM.pdf [file 41467_2021_25188_MOESM2_ESM.pdf]

**Title:** Supplementary Data 1.

**Description:** NanoString dataset of log<sub>2</sub> normalized counts in NIF and No-NIF nodes resected after neoadjuvant ICIs in the NEOSTAR randomized study
